# Supplementary material for: Prediction of solubility parameters of lignin and ionic liquids using multi-resolution simulation approaches
Source: Royal Society of Chemistry journal article supplement (doi:10.1039/d1gc03798f), 2021-12-03
Supplement: d1gc03798f1.pdf [file d1gc03798f1.pdf]

## *Supporting Information*

### **Prediction of Solubility Parameters of Lignin and Ionic Liquids Using Multi-resolution Simulation Approaches**

Mood Mohan<sup>1,2</sup>, Kaixuan Huang<sup>1,3,4,5</sup>, Venkataramana Reddy Pidatala<sup>1,3</sup>, Blake A. Simmons<sup>1,3</sup>,  
Seema Singh<sup>1,2</sup>, Kenneth Sale<sup>\*,1,6</sup>, and John Gladden<sup>\*,1,2</sup>

<sup>1</sup> Deconstruction Division, Joint BioEnergy Institute, 5885 Hollis Street, Emeryville, California 94608, United States

<sup>2</sup> Department of Biomaterials and Biomanufacturing, Sandia National Laboratories, 7011 East Avenue, Livermore, California 94551, United States

<sup>3</sup> Biological Systems and Engineering Division, Lawrence Berkeley National Laboratory, 1 Cyclotron Road, Berkeley, California 94720, United States

<sup>4</sup> Key Laboratory of Forestry Genetics & Biotechnology (Nanjing Forestry University), Ministry of Education, Nanjing 210037, People's Republic of China

<sup>5</sup> College of Marine and Bio-engineering, Yancheng Teachers University, Yancheng, Jiangsu 224002, People's Republic of China

<sup>6</sup> Department of Computational Biology and Biophysics, Sandia National Laboratories, 7011 East Avenue, Livermore, California 94551, United States

\*Corresponding Author

E-mail: [jmgladden@lbl.gov](mailto:jmgladden@lbl.gov); [jmgladd@sandia.gov](mailto:jmgladd@sandia.gov) (J. M. Gladden)

[klsale@lbl.gov](mailto:klsale@lbl.gov), [klsale@sandia.gov](mailto:klsale@sandia.gov) (Kenneth Sale)

## 1. Prediction of Eutectic Point Composition of mDES

To confirm the prepared molar ratio of mDES (HBA (ZnCl<sub>2</sub>) to HBD (ethylene glycol and glycerol)), a method has been formulated to predict the molar ratios using COSMO-RS model. The COSMO-RS model allows calculation of the activity coefficient of any compound in the mixture without any experimental data. The calculated activity coefficient value is then used in a simplified form of the solid-liquid equilibrium (SLE; solubility) equation (S1) to compute the DES curve and eutectic point:<sup>1,2</sup>

$$x_S^L = \frac{\exp\left(\frac{-\Delta H_{fus,S}}{RT_m} \left(\frac{1}{T} - \frac{1}{T_m}\right)\right)}{\gamma_S^L} \quad (S1)$$

Where  $\Delta H_{fus,S}$  and  $T_m$  is the enthalpy of fusion and melting temperature of pure solute, respectively,  $R$  is the real gas constant,  $T$  is the absolute temperature,  $\gamma_S^L$  is the activity coefficient of a solute in the liquid phase, and  $x_S^L$  is the mole fraction (solubility) of solute in the liquid phase. The pure component fusion properties of investigated molecules were taken from the literature and reported in Table S4. The DES curve is calculated as the mutual solubility of HBA in HBD and HBD in HBA as a function of temperature and concentration. Figure S4 shows the COSMO-RS predicted eutectic point composition of both mDESs studied. From Figure S4, it was clear that the predicted eutectic point compositions (ZnCl<sub>2</sub>:EG (1:4) and ZnCl<sub>2</sub>:Gly (1:3)) are in great agreement with the experimental observations, demonstrating the robustness of the COSMO-RS model for calculating the eutectic points of mDESs.<sup>3</sup>

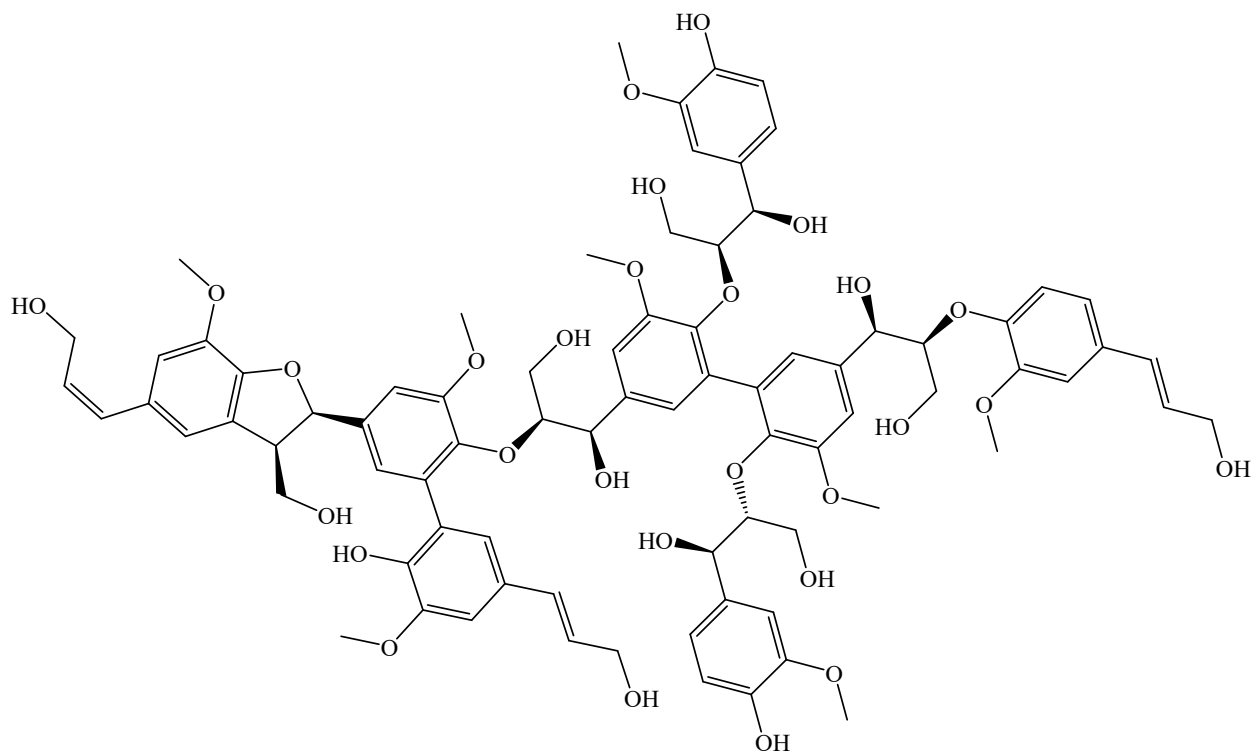

**Figure S1:** Chemical structures of lignin (DP = 8). The lignin molecule composed of all possible linkages such as  $\beta$ -5, 5-5, and  $\beta$ -O-4 linkages.

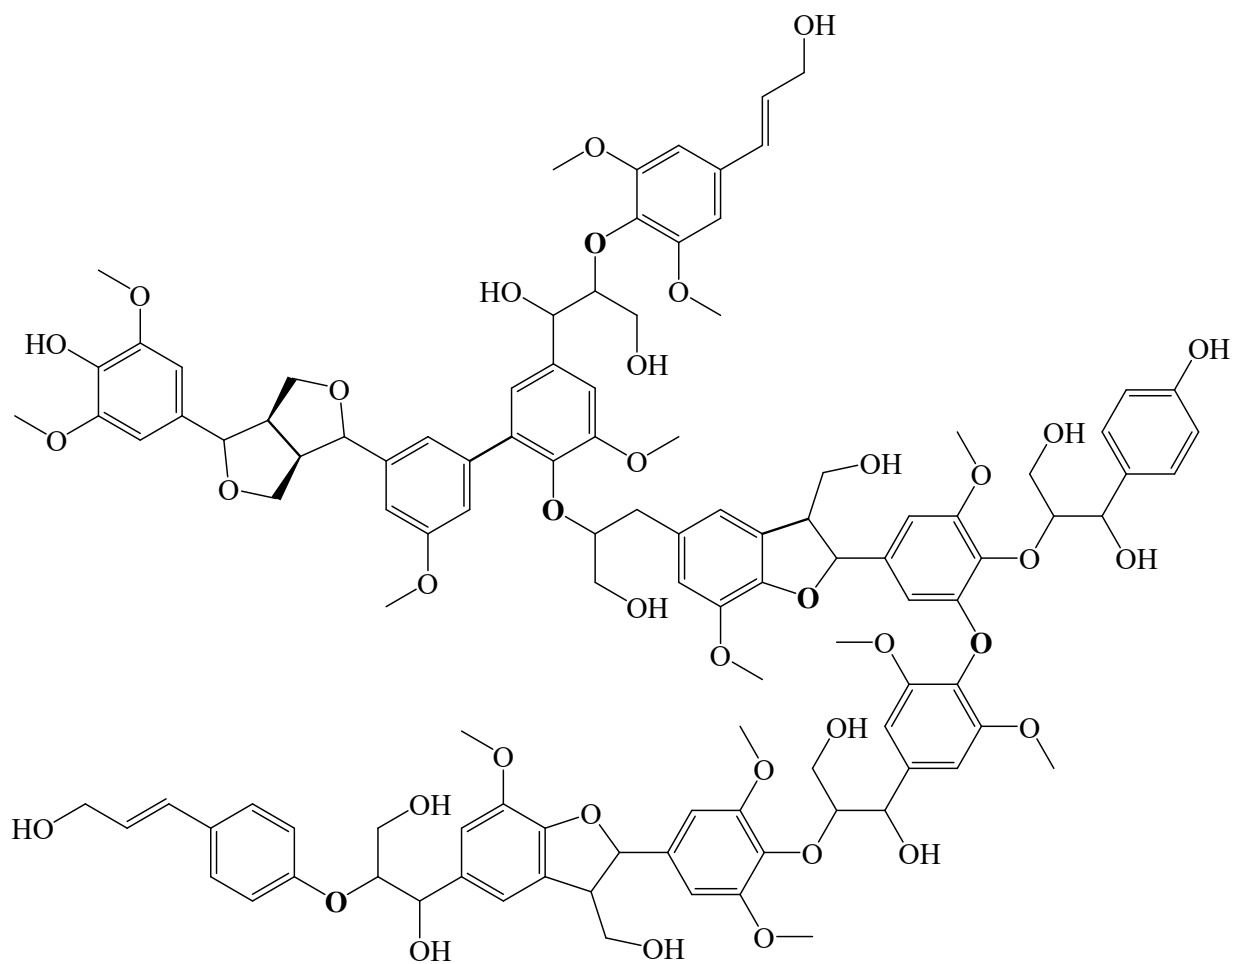

**Figure S2:** Chemical structures of lignin (DP = 11). The lignin molecule composed of all possible linkages such as β-β, β-5, 5-5, β-O-4, and 4-O-5 linkages.

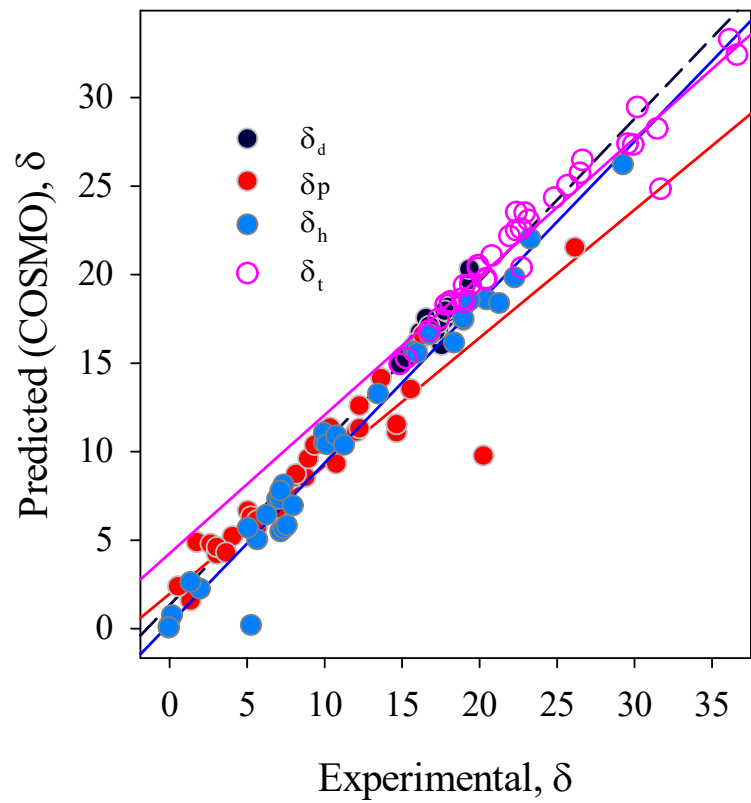

**Figure S3:** Predicted and experimental Hansen Solubility Parameters for Organic Solvents

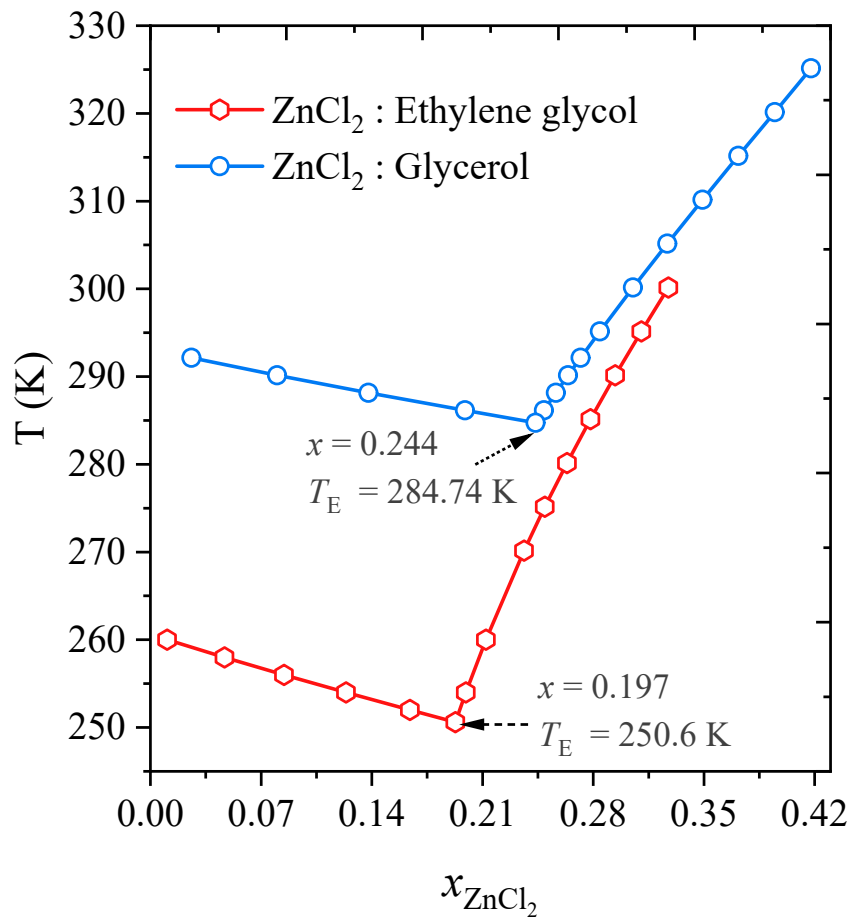

**Figure S4:** COSMO-RS predicted eutectic point composition of mDESs composed of zinc chloride with ethylene glycol and glycerol

**Table S1:** Densities ( $\rho$ ) of Ionic liquids and deep eutectic solvents obtained from MD Simulations and compared with experimental density.

| Ionic Liquid                 | $\rho_{\text{exp}}$ (g/cc) | $\rho_{\text{MD}}$ (g/cc) | Error (%) |
|------------------------------|----------------------------|---------------------------|-----------|
| [Ch][For]                    | -                          | 1.138                     | -         |
| [Ch][Ace]                    | 1.10                       | 1.081                     | 1.73      |
| [Ch][But]                    | 1.07                       | 1.043                     | 2.52      |
| [Ch][Hex]                    | 1.02                       | 0.997                     | 2.25      |
| [Ch][Oct]                    | -                          | 0.970                     | -         |
| [Ch][Lys]                    | 1.09                       | 1.062                     | 2.57      |
| [Ch][Lac]                    | 1.14                       | 1.130                     | 0.88      |
| [Emim][Ace]                  | 1.10                       | 1.112                     | 1.09      |
| [Emim][Lys]                  | -                          | 1.071                     | -         |
| ZnCl <sub>2</sub> -EG (1:4)  | -                          | 1.342                     | -         |
| ZnCl <sub>2</sub> -Gly (1:3) | 1.43                       | 1.458                     | 1.96      |

**Table S2:** Predicted Hansen Solubility Parameters Ionic Liquids and compared with the experimental values

| Ionic Liquid                  | COSMO-RS Predicted HSP (MPa <sup>1/2</sup> ) |            |            |            | Experimental <sup>a,b</sup> | Error (%) |
|-------------------------------|----------------------------------------------|------------|------------|------------|-----------------------------|-----------|
|                               | $\delta_d$                                   | $\delta_p$ | $\delta_h$ | $\delta_t$ |                             |           |
| [12OHEMIM][TF <sub>2</sub> N] | 18.43                                        | 11.61      | 13.37      | 25.56      | 26.49                       | 3.51      |
| [BMIM][HSO <sub>4</sub> ]     | 18.10                                        | 11.21      | 12.79      | 24.84      | 23.10                       | 7.52      |
| [BMIM][PF <sub>6</sub> ]      | 18.60                                        | 11.33      | 9.34       | 23.70      | 23.20                       | 2.16      |
| [BMIM][TF <sub>2</sub> N]     | 18.41                                        | 13.41      | 14.56      | 27.03      | 26.70                       | 1.24      |
| [EMIM][BF <sub>4</sub> ]      | 18.61                                        | 12.74      | 12.05      | 25.57      | 24.40                       | 4.80      |
| [EMIM][EtSO <sub>4</sub> ]    | 17.78                                        | 11.00      | 13.83      | 25.02      | 24.00                       | 4.45      |
| [BMIM][SCN]                   | 18.09                                        | 10.80      | 12.65      | 24.58      | 24.64                       | 0.25      |
| [BMIM][MeSO <sub>4</sub> ]    | 18.20                                        | 11.12      | 12.57      | 24.76      | 23.3                        | 6.25      |
| [BMPyr][DCN]                  | 18.47                                        | 12.83      | 12.03      | 25.52      | 25.54                       | 0.08      |

<sup>a</sup> Data taken from Weerachanchai *et al.* (2012)<sup>4</sup>; <sup>b</sup> Yoo *et al.* (2012)<sup>5</sup>

**Table S3:** COSMO-RS-based predicted Hansen solubility parameters of lignin monomers, dimers and trimers

| Lignin structure                                                                                             | COSMO-RS predicted HSP (MPa <sup>1/2</sup> ) |                            |                            |                            |
|--------------------------------------------------------------------------------------------------------------|----------------------------------------------|----------------------------|----------------------------|----------------------------|
|                                                                                                              | $\delta_d$                                   | $\delta_p$                 | $\delta_h$                 | $\delta_t$                 |
| 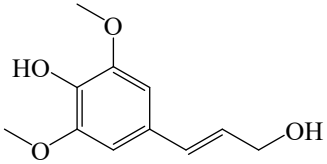 <p>Sinapyl alcohol</p>     | 18.45<br>19.2 <sup>a</sup>                   | 10.92<br>7.3 <sup>a</sup>  | 14.56<br>16.1 <sup>a</sup> | 25.92<br>26.1 <sup>a</sup> |
|  <p>p-Coumaryl alcohol</p>  | 18.41<br>19.2 <sup>a</sup>                   | 11.38<br>7 <sup>a</sup>    | 14.40<br>17.3 <sup>a</sup> | 26.0<br>26.7 <sup>a</sup>  |
|  <p>Vanillin</p>            | 18.58<br>19.6 <sup>a</sup>                   | 12.83<br>10.7 <sup>a</sup> | 13.81<br>12.5 <sup>a</sup> | 26.47<br>25.6 <sup>a</sup> |
|  <p>Coniferyl alcohol</p> | 18.41<br>19 <sup>a</sup>                     | 12.15<br>7 <sup>a</sup>    | 14.43<br>16.3 <sup>a</sup> | 26.36<br>26 <sup>a</sup>   |
|  <p>Ferulic acid</p>      | 18.41<br>19.8 <sup>a</sup>                   | 13.09<br>7.6 <sup>a</sup>  | 14.95<br>15.8 <sup>a</sup> | 27.08<br>26.4 <sup>a</sup> |
|  <p>CAT 5-5 CAT</p>       | 18.39                                        | 12.63                      | 23.35                      | 32.29                      |
|  <p>CAT 5-5 GUAI</p>      | 18.38                                        | 12.45                      | 21.90                      | 31.18                      |



|                                                                                                                                                           |       |       |       |       |
|-----------------------------------------------------------------------------------------------------------------------------------------------------------|-------|-------|-------|-------|
| 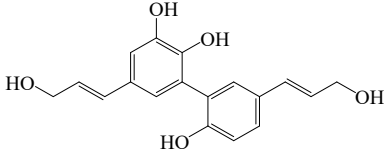 <p>CAT 5-5 PHP</p>                                                      | 18.39 | 12.77 | 22.73 | 31.91 |
|  <p>GUAI 5-5 GUAI</p>                                                    | 18.38 | 11.32 | 21.51 | 30.47 |
|  <p>PHP 5-5 PHP</p>                                                      | 18.38 | 12.05 | 22.08 | 31.15 |
|  <p>PHP <math>\gamma</math>-O-<math>\gamma</math> linkage Compound</p>   | 18.38 | 10.89 | 20.78 | 29.80 |
|  <p>PHP <math>\beta</math>-1 linkage Compound</p>                       | 18.38 | 12.04 | 21.80 | 30.95 |
|  <p>PHP <math>\alpha</math>-O-<math>\gamma</math> linkage Compound</p> | 18.37 | 11.23 | 20.64 | 29.83 |
|  <p>GUAI 4-O-5 linkage Compound</p>                                    | 18.37 | 10.14 | 19.03 | 28.33 |
|  <p>Lignin <math>\beta</math>-5 linkage Compound</p>                   | 18.38 | 12.25 | 22.14 | 31.28 |

|                                           |       |       |       |       |
|-------------------------------------------|-------|-------|-------|-------|
|                                           | 18.38 | 10.67 | 19.70 | 28.97 |
| Lignin $\beta$ -O-4 linkage Compound      |       |       |       |       |
|                                           | 18.37 | 9.93  | 21.04 | 29.64 |
| Lignin $\beta$ - $\beta$ linkage Compound |       |       |       |       |
|                                           | 18.36 | 9.29  | 17.86 | 27.41 |
| Dibenzodioxocin                           |       |       |       |       |
|                                           | 18.39 | 10.15 | 19.23 | 28.48 |
| Spirodienone                              |       |       |       |       |
|                                           | 18.46 | 12.80 | 14.60 | 26.79 |
| Syringaldehyde                            |       |       |       |       |
|                                           | 18.45 | 12.78 | 14.82 | 26.90 |
| Sinapylaldehyde                           |       |       |       |       |

|                                                                                                                 |       |       |       |       |
|-----------------------------------------------------------------------------------------------------------------|-------|-------|-------|-------|
| 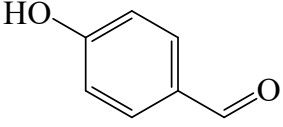 <p>p-Hydroxy benzaldehyde</p> | 18.42 | 13.71 | 16.78 | 28.44 |
|  <p>p-Coumaraldehyde</p>       | 18.40 | 12.99 | 20.69 | 30.58 |
|  <p>Coniferaldehyde</p>        | 18.46 | 12.81 | 13.97 | 26.46 |
|  <p>Catechol</p>               | 18.35 | 12.63 | 22.79 | 31.86 |
|  <p>Caffeic acid</p>          | 18.33 | 13.17 | 21.55 | 31.20 |

<sup>a</sup> Data taken from Hansen (2007)<sup>6</sup>

Table S4: Melting point and heat of fusion of HBA and HBD of mDESs investigated in this work

| Name of the compound | $T_m$ (K) | $\Delta H_f$ | Reference                                  |
|----------------------|-----------|--------------|--------------------------------------------|
| ZnCl <sub>2</sub>    | 581.25    | 3.886        | Trivedi et al. (2017) <sup>7</sup>         |
| Ethylene glycol      | 260.60    | 9.958        | Nikolaev and Rabinovich, 1967 <sup>8</sup> |
| Glycerol             | 293.15    | 18.285       | Acree, 1991 <sup>9</sup>                   |

## References

1. M. Mohan, V. V. Goud and T. Banerjee, *Fluid Phase Equilib.*, 2015, **395**, 33-43.
2. M. Mohan, T. Banerjee and V. V. Goud, *J. Chem. Eng. Data*, 2016, **61**, 2923-2932.
3. P. Kalhor, K. Ghandi, H. Ashraf and Z. Yu, *Phy. Chem. Chem. Phy.*, 2021.
4. P. Weerachanchai, Z. Chen, S. S. J. Leong, M. W. Chang and J.-M. Lee, *Chemical engineering journal*, 2012, **213**, 356-362.
5. B. Yoo, W. Afzal and J. M. Prausnitz, *Ind. Eng. Chem. Res.*, 2012, **51**, 9913-9917.
6. C. M. Hansen, *Hansen solubility parameters: a user's handbook*, CRC press, 2007.
7. M. K. Trivedi, K. K. Sethi, P. Panda and S. Jana, *International Journal of Pharmaceutical Investigation*, 2017, **7**, 33.
8. P. Nikolaev and I. Rabinovich, *Zhur. Fiz. Khim*, 1967, **41**, 2191-2194.
9. W. E. Acree Jr, *Thermochimica acta*, 1991, **189**, 37-56.
